# Supplementary material for: Impact of Sickle Cell Trait and Naturally Acquired Immunity on Uncomplicated Malaria after Controlled Human Malaria Infection in Adults in Gabon
Source: PubMed Central journal article supplement (PMC5929186; doi:10.4269/ajtmh.17-0343), 2017-12-18
Supplement: tpmd170343.SD1.pdf [file tpmd170343.SD1.pdf]

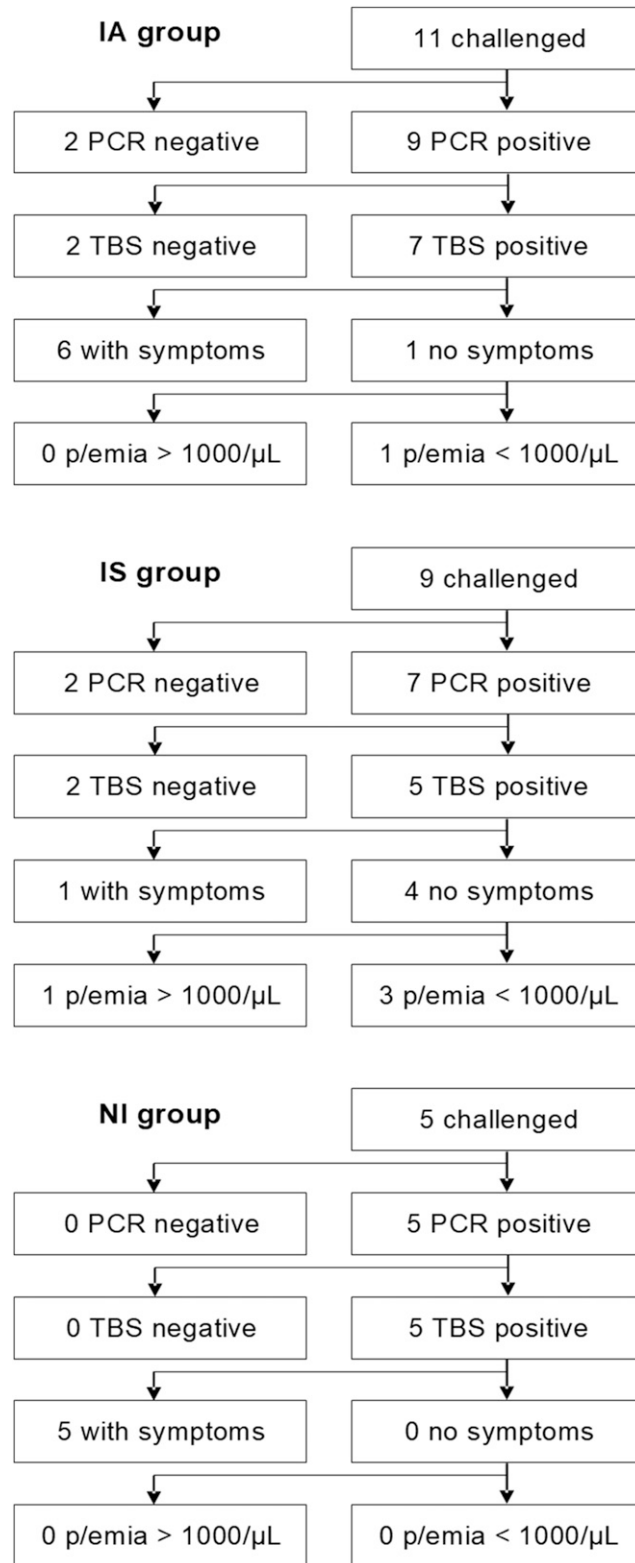

SUPPLEMENTAL FIGURE 1. Subject flow diagram.

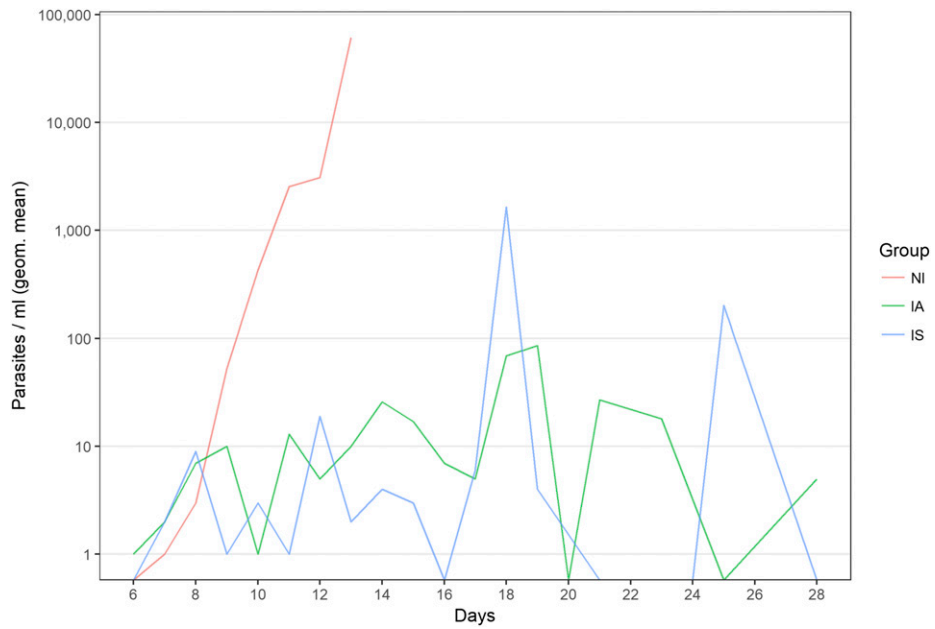

SUPPLEMENTAL FIGURE 2. Geometric mean parasitemia per milliliter on a logarithmic scale over the study, segregated by study group. Because of technical problems during storage and extraction of nucleic acids, the detection limit was raised for some samples. Samples with low parasitemia might therefore have incorrectly been recorded as negative.

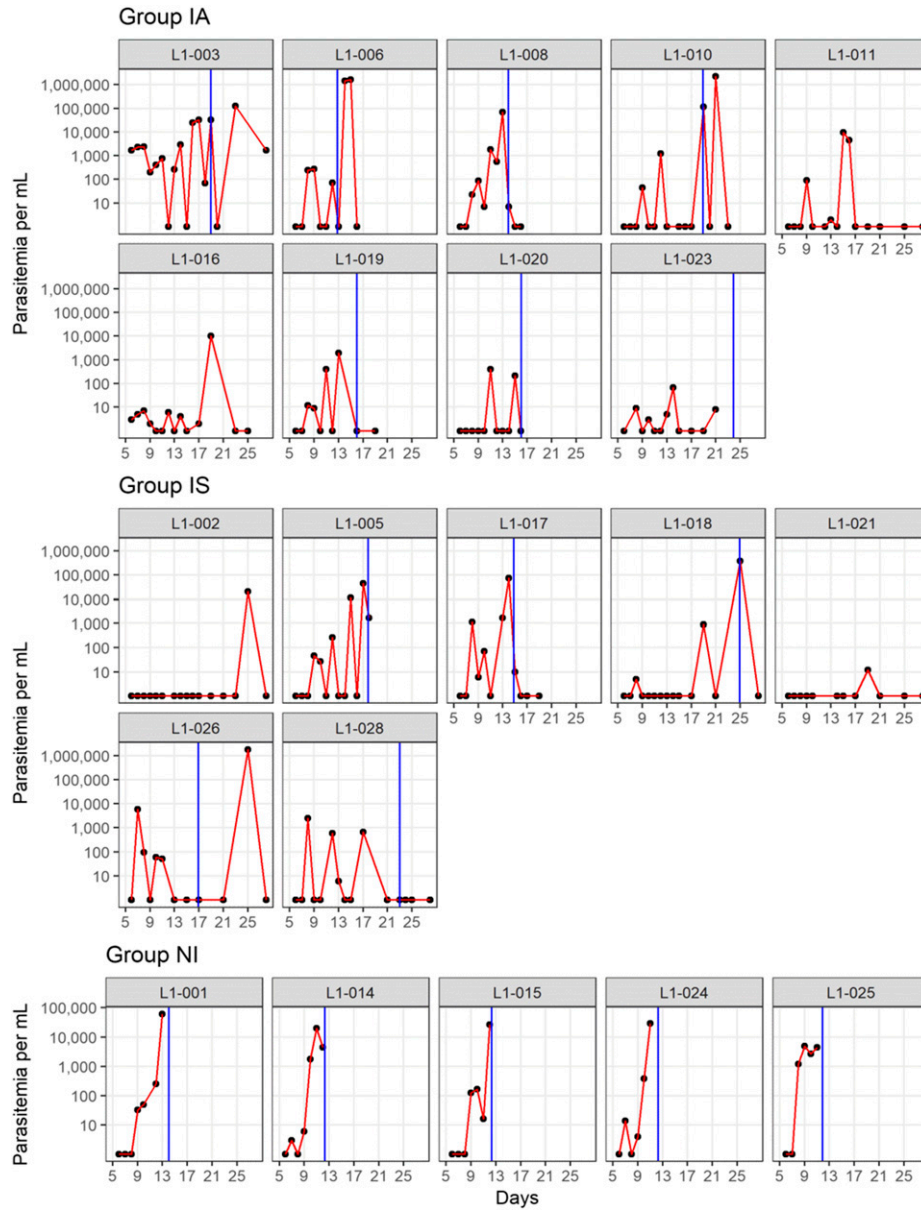

SUPPLEMENTAL FIGURE 3. Course of parasitemia over the study for each individual, grouped by study group. Vertical blue lines indicate time of thick blood smear positivity. Because of technical problems during storage and extraction of nucleic acids, the detection limit was raised for some samples. Samples with low parasitemia might therefore have incorrectly been recorded as negative.

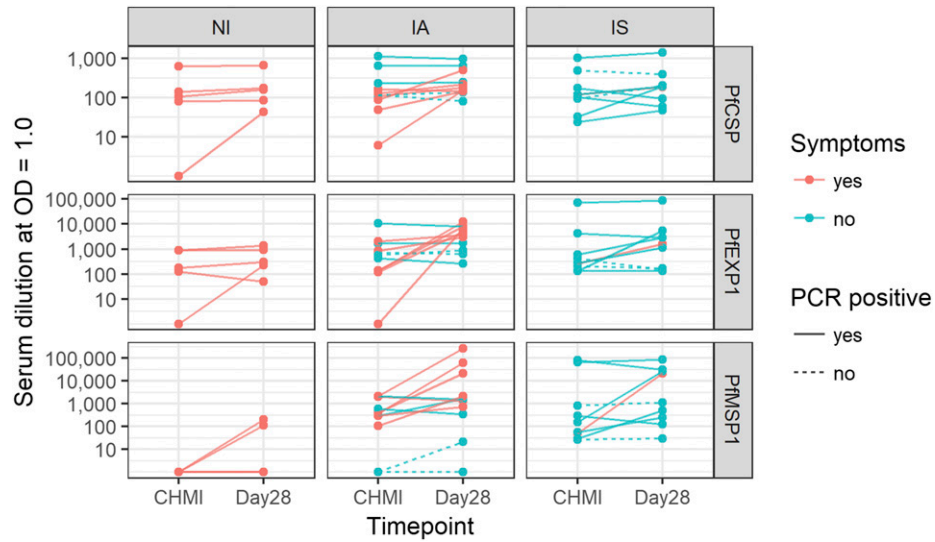

SUPPLEMENTAL FIGURE 4. Antibodies (serum dilution at which the optical density [OD] was 1.0) against *Plasmodium falciparum* circumsporozoite protein (PfCSP), exported protein-1 (PfEXP1) and merozoite surface protein-1 (PfMSP1) at the time of controlled human malaria infection (CHMI) and 28 days later.

SUPPLEMENT TABLE 1  
Grade 3 laboratory adverse events (AEs)

| Subject ID | Group | Visit*  | Sex | AE                     | Value (/nL) | Grade 3 limit (nL) |
|------------|-------|---------|-----|------------------------|-------------|--------------------|
| L1-005     | IS    | Malaria | F   | Leukocytes decreased   | 1.2         | < 1.5              |
| L1-005     | IS    | Malaria | F   | Lymphocytes decreased  | 0.33        | < 0.5              |
| L1-005     | IS    | Malaria | F   | Neutrophils decreased  | 0.84        | < 1.0              |
| L1-005     | IS    | Malaria | F   | Thrombocytes decreased | 91          | < 100              |
| L1-016     | IA    | Day 84  | M   | Thrombocytes decreased | 91          | < 100              |
| L1-017     | IS    | Malaria | M   | Thrombocytes decreased | 96          | < 100              |
| L1-023     | IA    | C-1     | F   | Thrombocytes decreased | 97          | < 100              |

\* "Malaria" is during an episode of malaria; "C-1" is the day before challenge.
